# Supplementary material for: Bone health in childhood low-grade glioma: an understudied problem
Source: PubMed Central journal article supplement — Endocr Connect. 2024 Sep 25;13(10):e240224. doi: 10.1530/EC-24-0224 (PMC11466249; doi:10.1530/ec-24-0224), 2024-09-25
Supplement: supplementary_material.pdf [file supplementary_material.pdf]

## Supplemental file for review

### Supplement 1

#### Operational definitions

In case of a bone problem: all data were collected **until** occurrence of the bone problem in order to assess it as associated factor. In case of no bone problems: it was collected whether the variables were present at any time during follow-up.

**Muscle problems.** Muscle problems were defined according to the Medical Research Council (MRC)-scale. The MRC-scale ranges from 0 to 5, expressing total paralysis to normal force respectively. A MRC score of 3 or lower in one of the muscles of the lower extremities was categorized as an associated factor for bone problems. The lowest MRC during follow-up was included.

**Inactivity.** Relative inactivity was defined as 'sometimes' use of a wheelchair (e.g. for longer distances) OR not performing any sports. Total inactivity was defined as wheelchair use in daily life of the patient.

#### **Chemotherapy and targeted therapy.**

Treatment with chemotherapy was collected, including:

- Carboplatin
- Vincristine
- Vinblastine
- Cisplatin
- Cyclophosphamide
- Temozolomide
- Irinotecan
- Bevacizumab (targeted therapy)
- Trametinib (targeted therapy)
- Tovorafenib (targeted therapy)

The number of chemotherapy rounds was collected.

#### **Weight problems due to hypothalamic dysfunction**

- **Diencephalic syndrome history.** Diencephalic syndrome was defined as being underweight at brain tumor diagnosis. Underweight was defined according to the international cutoff points of the WHO for children < 2 years of age (BMI < -2.0 SDS) (1). In children ≥ 2 years of age, underweight was defined according to the international cutoff point of Cole et al. using BMI thinness grade 2 (2).
- **Significant weight gain.** Significant weight gain was defined in line with a previous manuscript (3); an increase in BMI ≥ +2.0 standard deviation score (SDS) from diagnosis (maximum within 3 months) to most recent moment of follow-up.

**Visual problems.** Visual problems were defined according to scoring and reporting by the ophthalmologist following the definitions of visual impairment and blindness based on the tenth revision of the International Statistical Classification of Diseases and Related Health Problems. Visual problems were categorized based on the scoring of the best eye (impairment had to be present in both eyes); mild or no visual impairment (best corrected visual acuity (BCVA) ≤0.5 logMAR [Snellen fraction (SF) ≥20/70]); moderate visual impairment (BCVA >0.5 to 1.0 logMAR [SF <20/70 to

≥20/200]); severe visual impairment (BCVA >1.0 to 1.3 logMAR [SF <20/200 to ≥20/400]); blindness (BCVA >1.3 logMAR [SF <20/400]) (4).

**Vitamin D deficiency.** Vitamin D deficiency was defined as moderate when 25-OH-vitamin D in blood measurements were below 50 nmol/L during follow-up. Severe vitamin D deficiency was considered as 25-OH-vitamin D in serum below 30 nmol/L during follow-up (5).

**Glucocorticoids.** Data was collected on the maintenance dose of glucocorticoids; a maintenance dose above 10 mg/m<sup>2</sup> per day during follow-up was considered high. In addition, the number of hospital stays in the year before DXA scan was listed (as a reflection of stress of the body and thus need for extra hydrocortisone), more than 5 hospital stays were noted as an associated factor. Attending the hospital for a cure of chemotherapy was not considered a hospital stay.

### **Overweight and obesity**

In children ≥ 2 years of age, overweight, and obesity were defined according to the international cutoff point of BMI by sex and age for overweight and obesity by Cole et al (defined to pass through a BMI of respectively 25 and 30 kg/m<sup>2</sup> at the age 18) (6).

### **Hypothalamic syndrome.**

For presence of hypothalamic syndrome, a score based on the diagnostic criteria for hypothalamic syndrome, as defined by Van Santen et al., was used in this study (7).

### **Hyperphagia**

- *Mild (can be controlled by parental restriction or patient itself)*
- *Mild after specific intervention for hyperphagia OR severe (cannot be controlled by parents or patient itself or steals food)*

### **Hypophagia**

- *Mild (can be stimulated to eat by parents/caregivers)*
- *Severe (cannot be stimulated to eat by parents/caregivers or requires tube feeding or eating)*

### **BMI**

- *Normal weight or overweight*
- *Normal weight after specific intervention for hypothalamic obesity OR overweight after specific intervention for hypothalamic obesity OR obesity*

### **Behavioral problems**

- *Mild (can be corrected by parents/caregivers)*
- *Mild after specific intervention for hypothalamic behavioral problems OR severe (cannot be corrected by parents/caregivers, requires specialist treatment)*

### **Sleep disorder**

- *Mild (one or more sleep symptoms without disruption of school and/or family)*
- *Mild after specific intervention such as melatonin OR severe (disrupts school and/or family, diagnosis of obstructive sleep apnea syndrome)*

### **Temperature dysregulation**

- *Mild, core-temperature multiple times between 35 and 36 degrees or above 37,5 degrees without infection*

- *Severe (needs intervention such as specialized heat clothing), core-temperature measured below < 35 degrees*

***Pituitary dysfunction***

- *Partial or complete pituitary dysfunction (with or without DI with adequate thirst feeling) OR SIADH OR history of central precocious puberty*
- *(Partial or complete) pituitary dysfunction including DI and adipsia (inadequate thirst feeling)*

***Pituitary dysfunction.***

Pituitary dysfunction was categorized as having any anterior pituitary deficiency (growth hormone (GH), thyroid-stimulating hormone (TSH), luteinizing hormone (LH), follicle-stimulating hormone (FSH), adrenocorticotrophic hormone (ACTH)) or posterior pituitary deficiency (arginine vasopressin deficiency) or central precocious puberty (CPP).

Detailed description of pituitary deficiencies is included in *Supplement 2*.

***Tumor recurrence / progression***

Tumor recurrence was defined as any growth (greater than normal variability) of the tumor on MRI scan as described by radiologist.

## Supplement 2 Definitions of pituitary deficiencies

**Growth hormone deficiency.** Growth hormone deficiency is defined as a shortage in growth hormone and is scored with CTC-AE grade. GH deficiency is present when:

- IGF-1 < -2 SD corrected for age and sex in combination with declining growth curve or lack of acceleration during pubertal development in combination with:
  - o Peak GH in GH stimulation tests (Arginine, L-dopa propranolol, or Clonidine) < 30 mE/l or
- IGF-1 < 0 SD corrected for age and sex in combination with declining growth curve or lack of acceleration during pubertal development in combination with:
  - Peak GH in GH stimulation tests (Arginine, L-dopa propranolol, or Clonidine) < 20 mE/l.

**Hypogonadism.** Hypogonadism was defined as presence of either hyper – or hypogonadotropic gonadal dysfunction (including estrogen deficiency and testosterone deficiency) and was scored with CTC-AE grade. Hypogonadism was defined present in case of:

- Female = Tanner stage B1 in girls equal or older than 13 years: low-normal LH/FSH values in combination with low estradiol
- Male = Testes volume <3 cc or no Tanner stage G2 at age >14 years in boys low-normal LH/FSH values in combination with low testosterone
- Treatment = with testosterone or estrogens given with diagnosis of hypogonadism by treating physician.

**Hypothyroidism.** Hypothyroidism was defined based on FT4 and TSH values and data in the medical chart and scored with CTC-AE grade. Hypothyroidism was defined present when:

- FT4 < 10.0 pmol/L or
- TSH > 5 mU/L
- Decline of FT4 in time > 20% with low-normal or slightly elevated TSH concentrations or
- Treatment already started with thyroxine and FT4 values within normal range with low TSH levels during treatment and diagnosis of central or primary hypothyroidism.

### **Hyperthyroidism.**

Hyperthyroidism was defined as present in case of decreased levels of TSH (< 0.3 mE/L) and increased T4 (> 20 pmol/L), use of anti-thyroid medication, or defined as such in the medical chart.

**Hypocortisolism.** Hypocortisolism was defined based on cortisol levels and scored with CTC-AE grade. Hypocortisolism was defined present when:

- Morning cortisol < 80 nmol/L or peak cortisol in synacthen test < 550 nmol/L or 11-deoxycortisol in metyrapon test < 200
- Treatment already started with hydrocortisone for diagnosis central hypocortisolism.
- If present the date of determination has to be noted down.

### Supplement 3

**Supplemental Table 1** Descriptive characteristics of children with supratentorial midline LGG until first bone problem (N = 161).

| Patient characteristic                                          | % (n/N)                         |
|-----------------------------------------------------------------|---------------------------------|
| Sex at birth, female                                            | 49.1% (79/161)                  |
| Age at brain tumor diagnosis, median in years (IQR)(full range) | 4.7 (2.1 – 8.3)(0.1 – 17.9)     |
| Follow-up time, median in years (IQR)(full range)               | 6.1 (3.3 – 10.6)(0.1– 19.9)     |
| Age at follow-up, median in years (IQR)(full range)             | 12.6 (7.9 – 17.6)(2.5 – 28.1)   |
| Histology                                                       |                                 |
| - Pilocytic astrocytoma                                         | 44.1% (71/161)                  |
| - LGG NOS                                                       | 3.7% (6/161)                    |
| - Glioneuronal tumor                                            | 1.9% (3/161)                    |
| - Ganglioglioma                                                 | 1.2% (2/161)                    |
| - Diffuse astrocytoma                                           | 0.6% (1/161)                    |
| - Other forms                                                   | 1.2% (2/161)                    |
| - No biopsy taken                                               | 47.2% (76/161)                  |
| Growth of primary tumor                                         |                                 |
| - Prechiasmatic                                                 | 16.8% (25/149)                  |
| - Chiasmatic                                                    | 55.0% (82/149)                  |
| - Postchiasmatic                                                | 28.2% (42/149)                  |
| Hydrocephalus at diagnosis, Yes                                 | 29.8% (48/161)                  |
| Metastases at diagnosis, Yes                                    | 8.1% (13/161)                   |
| Neurosurgical tumor treatment                                   |                                 |
| - Surgery, Yes*                                                 | 55.3% (89/161)                  |
| - Number of surgeries in total, median (IQR)(range)*            | 2 (1 – 2)(1 – 6)                |
| - Ventricular drainage at diagnosis                             | 23.6% (38/161)                  |
| - Ventricular drainage during follow-up*                        | 16.1% (26/161)                  |
| - Radical resection at diagnosis                                | 0.6% (1/161)                    |
| - Limited resection at diagnosis                                | 1.2% (2/161)                    |
| - Subtotal tumor resection at diagnosis                         | 16.8% (27/161)                  |
| - Cyst drainage at diagnosis                                    | 3.7% (6/161)                    |
| - Performed surgery at diagnosis unknown                        | 1.2% (2/161)                    |
| - Radical resection during follow-up                            | 2.5% (4/161)                    |
| - Limited resection during follow-up                            | 9.3% (15/161)                   |
| - Subtotal resection during follow-up                           | 22.4% (36/161)                  |
| - Cyst drainage during follow-up                                | 11.2% (18/161)                  |
| - Performed surgery at follow-up unknown                        | 0.0% (0/161)                    |
| Chemotherapy treatment                                          |                                 |
| - Chemotherapy, Yes                                             | 70.2% (113/161)                 |
| - Number of chemotherapy treatment periods (IQR)(range)         | 2 (1 – 3)(1 – 5)                |
| Targeted therapy treatment                                      |                                 |
| - Targeted therapy, Yes                                         | 27.3% (44/161)                  |
| - Bevacizumab                                                   | 24.2% (39/161)                  |
| - Trametinib                                                    | 9.9% (16/161)                   |
| - Tovorafenib                                                   | 1.9% (3/161)                    |
| - Dabrafenib                                                    | 1.2% (2/161)                    |
| Radiotherapy treatment                                          |                                 |
| - Radiotherapy, Yes                                             | 8.1% (13/161)                   |
| - Dose, median in Gy (IQR)(range) N = 12                        | 54.0 (50.4 – 54.0)(50.4 – 54.0) |

|                                                                          |                             |
|--------------------------------------------------------------------------|-----------------------------|
| Multiple treatment modalities                                            |                             |
| - Wait and see                                                           | 14.3% (23/161)              |
| - Surgery only                                                           | 11.8% (19/161)              |
| - Surgery + chemotherapy                                                 | 23.0% (37/161)              |
| - Surgery + chemotherapy + targeted therapy                              | 13.7% (22/161)              |
| - Surgery + chemotherapy + radiotherapy                                  | 1.9% (3/161)                |
| - Surgery + chemotherapy + targeted therapy + radiotherapy               | 1.2% (2/161)                |
| - Surgery + radiotherapy                                                 | 3.7% (6/161)                |
| - Chemotherapy only                                                      | 17.4% (28/161)              |
| - Chemotherapy + targeted therapy                                        | 12.4% (20/161)              |
| - Chemotherapy + radiotherapy                                            | 0.6% (1/161)                |
| Progression since primary cancer diagnosis, Yes                          | 75.0% (111/148)             |
| State of disease at follow-up time                                       |                             |
| - Alive, free from tumor (complete resection)                            | 2.6% (4/151)                |
| - Alive with residual tumor                                              | 76.2% (115/151)             |
| - Relapse after complete resection                                       | 1.3% (2/151)                |
| - Progression of residual tumor                                          | 18.5% (28/151)              |
| - Deceased                                                               | 1.3% (2/151)                |
| BMI at tumor diagnosis, mean in SDS (SD)(full range) <i>N</i> = 115      | -0.1 ±1.9 (-5.4 – 4.1)      |
| Weight category at tumor diagnosis                                       |                             |
| - Underweight                                                            | 16.5% (19/115)              |
| - Normal weight                                                          | 60.9% (70/115)              |
| - Overweight                                                             | 16.5% (19/115)              |
| - Obesity                                                                | 6.1% (7/115)                |
| BMI at follow-up, mean in SDS (SD)(full range) <i>N</i> = 153            | 1.4 ±1.4 (-2.7 – 4.6)       |
| Weight category at follow-up                                             |                             |
| - Underweight                                                            | 2.0% (3/153)                |
| - Normal weight                                                          | 52.9% (81/153)              |
| - Overweight                                                             | 29.4% (45/153)              |
| - Obesity                                                                | 15.7% (24/153)              |
| ΔBMI SDS from diagnosis to follow-up (median)(full range) <i>N</i> = 113 | 1.0 (0.1 – 2.6)(-3.3 – 8.7) |

**Legend to Supplemental Table 1**

\*only neurosurgery, meaning that hydrocephalus surgery or revision of an existing hydrocephalus device was not counted for total numbers of surgeries

IQR = interquartile range

**Supplemental Table 2** Covariates of the hypothalamic syndrome in children with bone problems compared to without bone problems, in only the children specifically assessed for bone problems (N = 99).

| Covariate                                                                                                                                          | Children with bone problems (%<br>n/N)<br>N = 36 | Children without bone problems (%<br>n/N)<br>N = 125 | p-value           |
|----------------------------------------------------------------------------------------------------------------------------------------------------|--------------------------------------------------|------------------------------------------------------|-------------------|
| <b>Hypothalamic syndrome<sup>α</sup>, Yes</b>                                                                                                      | 60.0% (15/25)                                    | 50.0% (29/58)                                        | 0.402             |
| <b>Hyperphagia</b>                                                                                                                                 |                                                  |                                                      |                   |
| - Mild                                                                                                                                             | 25.0% (5/20)                                     | 22.4% (13/58)                                        | 0.134             |
| - Severe                                                                                                                                           | 0.0% (0/20)                                      | 17.2% (10/58)                                        |                   |
| <b>Hypophagia</b>                                                                                                                                  |                                                  |                                                      |                   |
| - Mild                                                                                                                                             | 5.0% (1/20)                                      | 0.0% (0/57)                                          | <b>&lt;0.001*</b> |
| - Severe                                                                                                                                           | 20.0% (4/20)                                     | 0.0% (0/57)                                          |                   |
| <b>BMI</b>                                                                                                                                         |                                                  |                                                      |                   |
| - Normal weight or overweight                                                                                                                      | 90.3% (28/31)                                    | 77.4% (48/62)                                        | 0.129             |
| - Normal weight after specific intervention for hypothalamic obesity OR overweight after specific intervention for hypothalamic obesity OR obesity | 9.7% (3/31)                                      | 22.6% (14/62)                                        |                   |
| <b>Behavioral problems</b>                                                                                                                         |                                                  |                                                      |                   |
| - Mild                                                                                                                                             | 30.0% (6/20)                                     | 30.8% (16/52)                                        | 0.203             |
| - Severe                                                                                                                                           | 0.0% (0/20)                                      | 13.5% (7/52)                                         |                   |
| <b>Sleep disorder</b>                                                                                                                              |                                                  |                                                      |                   |
| - Mild                                                                                                                                             | 25.9% (7/27)                                     | 30.0% (18/60)                                        | 0.089             |
| - Severe                                                                                                                                           | 33.3% (9/27)                                     | 13.3% (8/60)                                         |                   |
| <b>Temperature dysregulation</b>                                                                                                                   |                                                  |                                                      |                   |
| - Mild                                                                                                                                             | 37.5% (3/8)                                      | 48.3% (14/29)                                        | 0.166             |
| - Severe                                                                                                                                           | 25.0% (2/8)                                      | 3.4% (1/29)                                          |                   |
| <b>Pituitary dysfunction</b>                                                                                                                       |                                                  |                                                      |                   |
| - Partial or complete pituitary dysfunction (with or without DI with adequate thirst feeling) OR SIADH OR history of central precocious puberty    | 45.7% (16/35)                                    | 46.8% (29/62)                                        | 0.270             |
| - (Partial or complete) pituitary dysfunction including DI and adipsia (inadequate thirst feeling)                                                 | 8.6% (3/35)                                      | 1.6% (1/62)                                          |                   |

**Legend to Supplemental Table 2**

<sup>Ω</sup> *Based on the scoring of van Santen et al (7) (supplemental file).*

Definitions of all variables are attached in *Supplement 1*.

P-value for between-group differences calculated with Pearson Chi-Squared Test and Fisher's Exact Test. If more than 20% of expected values were under five, Fisher's exact test was performed. For continuous variables (with non-normal distribution), the Mann-Whitney U test was used.



**Supplemental Table 3** Covariates in children with bone problems compared to without bone problems, in all children (N = 161).

| Covariate                                                      | Children with bone problems (%<br>n/N)<br>N = 36 | Children without bone problems (%<br>n/N)<br>N = 125 | p-value            |
|----------------------------------------------------------------|--------------------------------------------------|------------------------------------------------------|--------------------|
| Sex at birth, Female                                           | 52.8% (19/36)                                    | 48.0% (60/125)                                       | 0.613              |
| Age at brain tumor diagnosis, median in years (IQR)(range)     | 3.2 (0.6 – 7.9)(0.3 – 16.5)                      | 4.9 (2.8 – 8.9)(0.1 – 17.9)                          | <b>0.012*</b>      |
| Follow-up time, median in years (IQR)(range)                   | 3.6 (2.2 – 5.9)(0.0 – 13.9)                      | 7.1 (3.8 – 11.3)(0.0 – 19.9)                         | <b>&lt;0.001*</b>  |
| Muscle problems, Yes                                           | 25.0% (5/20)                                     | 8.7% (9/104)                                         | 0.050              |
| Inactivity                                                     |                                                  |                                                      |                    |
| - Relative                                                     | 52.8% (19/36)                                    | 42.4% (53/125)                                       | 0.185              |
| - Total                                                        | 11.1% (4/36)                                     | 5.6% (7/125)                                         |                    |
| Diencephalic syndrome history, Yes                             | 50.0% (13/26)                                    | 6.7% (6/89)                                          | <b>&lt; 0.001*</b> |
| Visual problems                                                |                                                  |                                                      | <b>0.003*</b>      |
| - No/mild                                                      | 43.5% (10/23)                                    | 79.4% (81/102)                                       |                    |
| - Moderate                                                     | 26.1% (6/23)                                     | 10.8% (11/102)                                       |                    |
| - Severe                                                       | 8.7% (2/23)                                      | 2.0% (2/102)                                         |                    |
| - Blindness                                                    | 21.7% (5/23)                                     | 7.8% (8/102)                                         |                    |
| Vitamin D deficiency                                           |                                                  |                                                      | 0.597              |
| - Moderate                                                     | 23.1% (3/13)                                     | 32.4% (22/68)                                        |                    |
| - Severe                                                       | 23.1% (3/13)                                     | 29.4% (20/68)                                        |                    |
| Pituitary dysfunction, Yes                                     |                                                  |                                                      |                    |
| - GH deficiency                                                | 22.2% (8/36)                                     | 9.9% (12/121)                                        | 0.083              |
| - ACTH deficiency                                              | 25.0% (9/36)                                     | 5.8% (7/121)                                         | <b>0.002*</b>      |
| - TSH deficiency                                               | 27.8% (10/36)                                    | 9.9% (12/121)                                        | <b>0.012*</b>      |
| - LH/FSH deficiency                                            | 2.8% (1/36)                                      | 1.7% (2/121)                                         | 0.545              |
| - Arginine vasopressin deficiency with thirst feeling          | 11.1% (4/36)                                     | 3.3% (4/121)                                         | 0.082              |
| - Arginine vasopressin deficiency without thirst feeling       | 8.3% (3/36)                                      | 0.8% (1/121)                                         | <b>0.038*</b>      |
| - No pituitary deficiency                                      | 63.9% (23/36)                                    | 85.1% (103/121)                                      | <b>0.008*</b>      |
| - CPP                                                          | 38.5% (10/26)                                    | 30.1% (25/83)                                        | 0.474              |
| - Elevated IGF-1                                               | 42.4% (14/33)                                    | 22.9% (25/109)                                       | <b>0.044*</b>      |
| Overweight at follow-up/time of bone problem                   | 25.8% (8/31)                                     | 30.3% (37/122)                                       | 0.667              |
| Obesity at follow-up/time of bone problem                      | 12.9% (4/31)                                     | 16.4% (20/122)                                       | 0.786              |
| Significant weight gain                                        | 50.0% (12/24)                                    | 30.3% (27/89)                                        | 0.092              |
| ΔBMI SDS from diagnosis to follow-up, median (IQR)(full range) | 2.2 (0.5 – 4.8) (-1.0 – 8.7)                     | 0.8 (0.1 – 2.3) (-3.3 – 7.0)                         | <b>0.016*</b>      |
| Surgery treatment, Yes                                         | 72.2% (26/36)                                    | 50.4% (63/125)                                       | <b>0.023*</b>      |
| Number of surgeries, median (IQR)(range)                       | 2 (1 – 2)(1 – 6)                                 | 2 (1 – 2)(1 – 5)                                     | 0.766              |
| Chemotherapy, Yes                                              | 72.2% (26/36)                                    | 69.6% (87/125)                                       | 0.838              |
| Number of chemotherapy rounds, median (IQR)(range)             | 2 (1 – 3)(1 – 4)                                 | 2 (1 – 3)(1 – 5)                                     | 0.640              |
| Targeted therapy                                               | 27.8% (10/36)                                    | 27.2% (34/125)                                       | 0.999              |
| - Trametinib                                                   | 13.9% (5/36)                                     | 8.8% (11/125)                                        | 0.356              |
| - Tovorafenib                                                  | 0.0% (0/36)                                      | 2.4% (3/125)                                         | 0.999              |
| VCR neuropathy                                                 | 25.0% (9/36)                                     | 21.6% (27/125)                                       | 0.821              |

|                                             |               |                |       |
|---------------------------------------------|---------------|----------------|-------|
| <b>Tumor recurrence or progression, Yes</b> | 74.3% (26/35) | 75.2% (85/113) | 0.999 |
|---------------------------------------------|---------------|----------------|-------|

***Legend to Supplemental Table 3***

*\*indicates a significant p-value ( $p < 0.05$ )*

*\*\*Any clinical relevant weight problem associated with hypothalamic dysfunction includes:  
Diencephalic syndrome history OR significant weight gain*

Abbreviations: ACTH, Adrenocorticotrophic hormone; DI, Diabetes Insipidus; GH, Growth hormone; IGF-1, insulin-like growth factor 1; LH/FSH, Luteinizing hormone/follicle-stimulating hormone; TSH, Thyroid stimulating hormone; SIADH, syndrome of inappropriate antidiuretic hormone.

Muscle problems: MRC of 3 or lower. Definitions of all variables are attached in *Supplement 1*.

P-value for between-group differences calculated with Pearson Chi-Squared Test and Fisher's Exact Test. If more than 20% of expected values were under five, Fisher's exact test was performed. For continuous variables (with non-normal distribution), the Mann-Whitney U test was used.

**Supplemental Table 4** Associated factors with bone problems (multivariable analysis), in all children (N = 161).

| Covariate                                                                          | All children (N = 100)<br>OR (95% CI) | P-value       |
|------------------------------------------------------------------------------------|---------------------------------------|---------------|
| Age at tumor diagnosis                                                             | 0.97 (0.86 – 1.11)                    | 0.663         |
| Weight problems due to hypothalamic dysfunction or overweight/obesity at follow-up | 1.49 (0.51 – 4.34)                    | 0.463         |
| Visual problems (moderate/severe/blindness vs. none)                               | 3.56 (1.30 – 9.76)                    | <b>0.014*</b> |

**Legend to Supplemental Table 4**

*\*indicates a significant p-value ( $p < 0.05$ ).*

Definitions of all variables are attached in *Supplement 1*.

*Weight problems includes: Diencephalic syndrome history OR significant weight gain OR overweight at follow-up OR obesity at follow-up*

Multivariable binary logistic regression. P-value calculated with Wald test.

## References

1. de Onis M, Onyango AW, Borghi E, Siyam A, Nishida C, Siekmann J. Development of a WHO growth reference for school-aged children and adolescents. *Bull World Health Organ.* 2007;85(9):660-7.
2. Cole TJ, Flegal KM, Nicholls D, Jackson AA. Body mass index cut offs to define thinness in children and adolescents: international survey. *Bmj.* 2007;335(7612):194.
3. Schaik Jv, Roessel IMAAv, Meeteren NAYNS-v, Iersel Lv, Clement SC, Boot AM, et al. High Prevalence of Weight Gain in Childhood Brain Tumor Survivors and Its Association With Hypothalamic-Pituitary Dysfunction. *Journal of Clinical Oncology.* 2021;39(11):1264-73.
4. Moussa G, Bassilious K, Mathews N. A novel excel sheet conversion tool from Snellen fraction to LogMAR including 'counting fingers', 'hand movement', 'light perception' and 'no light perception' and focused review of literature of low visual acuity reference values. *Acta Ophthalmol.* 2021;99(6):e963-e5.
5. van Atteveld JE, de Winter DTC, Pluimakers VG, Fiocco M, Nievelstein RAJ, Hobbelink MGG, et al. Risk and determinants of low and very low bone mineral density and fractures in a national cohort of Dutch adult childhood cancer survivors (DCCSS-LATER): a cross-sectional study. *Lancet Diabetes Endocrinol.* 2023;11(1):21-32.
6. Cole TJ, Bellizzi MC, Flegal KM, Dietz WH. Establishing a standard definition for child overweight and obesity worldwide: international survey. *Bmj.* 2000;320(7244):1240-3.
7. van Santen HM, van Schaik J, van Roessel I, Beckhaus J, Boekhoff S, Müller HL. Diagnostic criteria for the hypothalamic syndrome in childhood. *Eur J Endocrinol.* 2023;188(2).
